# Supplementary material
Source: PubMed Central journal article supplement (PMC4884445)
Supplement: NIHMS68180-supplement-Supplemental_material.pdf [file NIHMS68180-supplement-Supplemental_material.pdf]

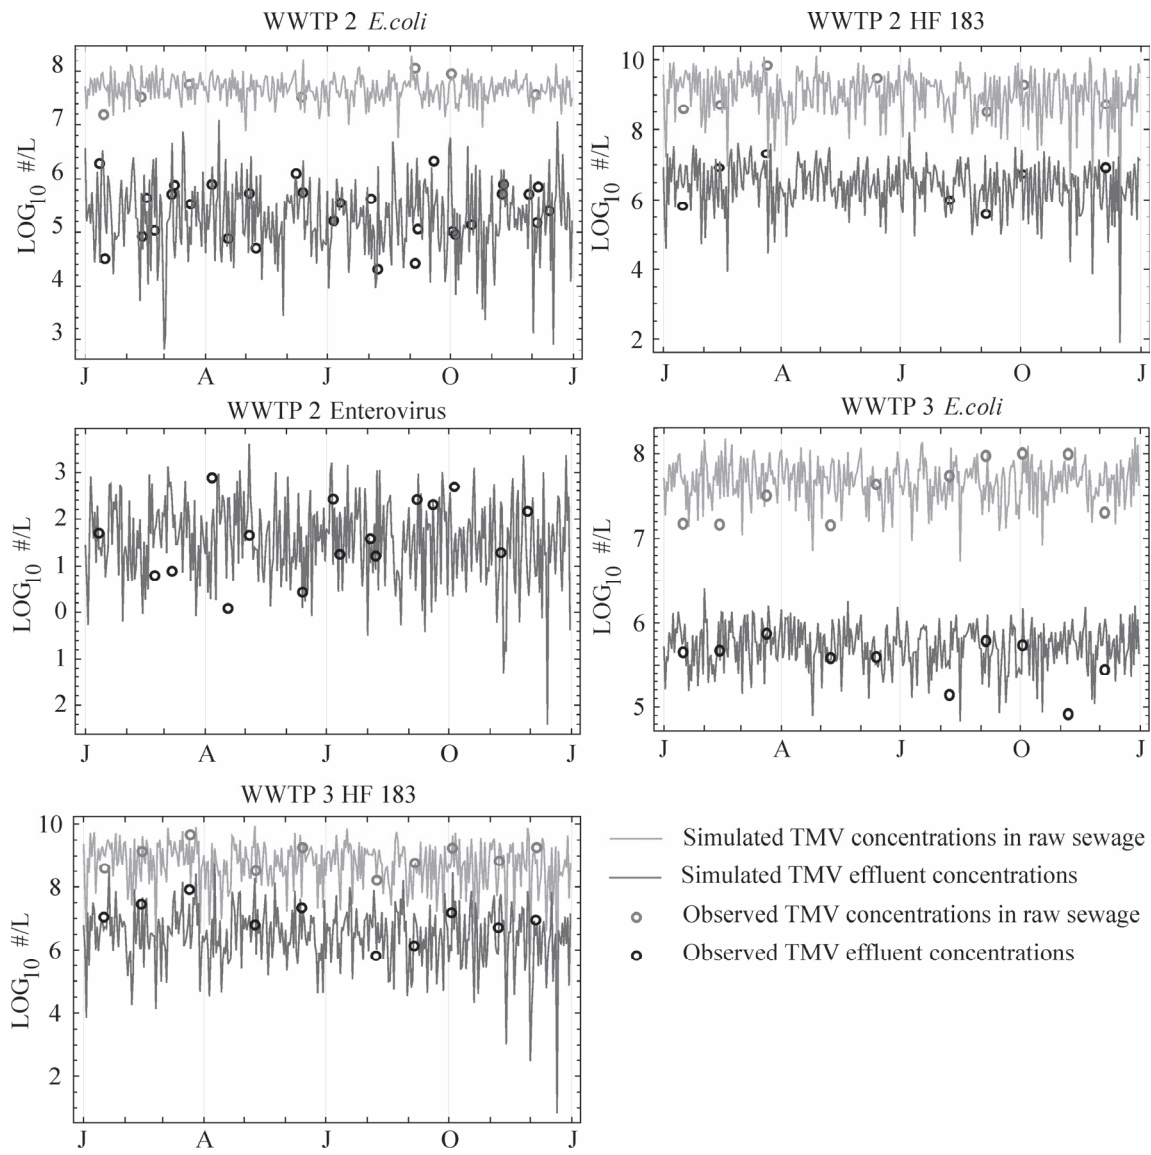

SI Figure 1: Simulated and observed concentrations in raw sewage and wastewater effluent of WWTPs 2 and 3 for enterovirus, *E.coli* and HF183\_II based on pooled data from 2010 to 2013.

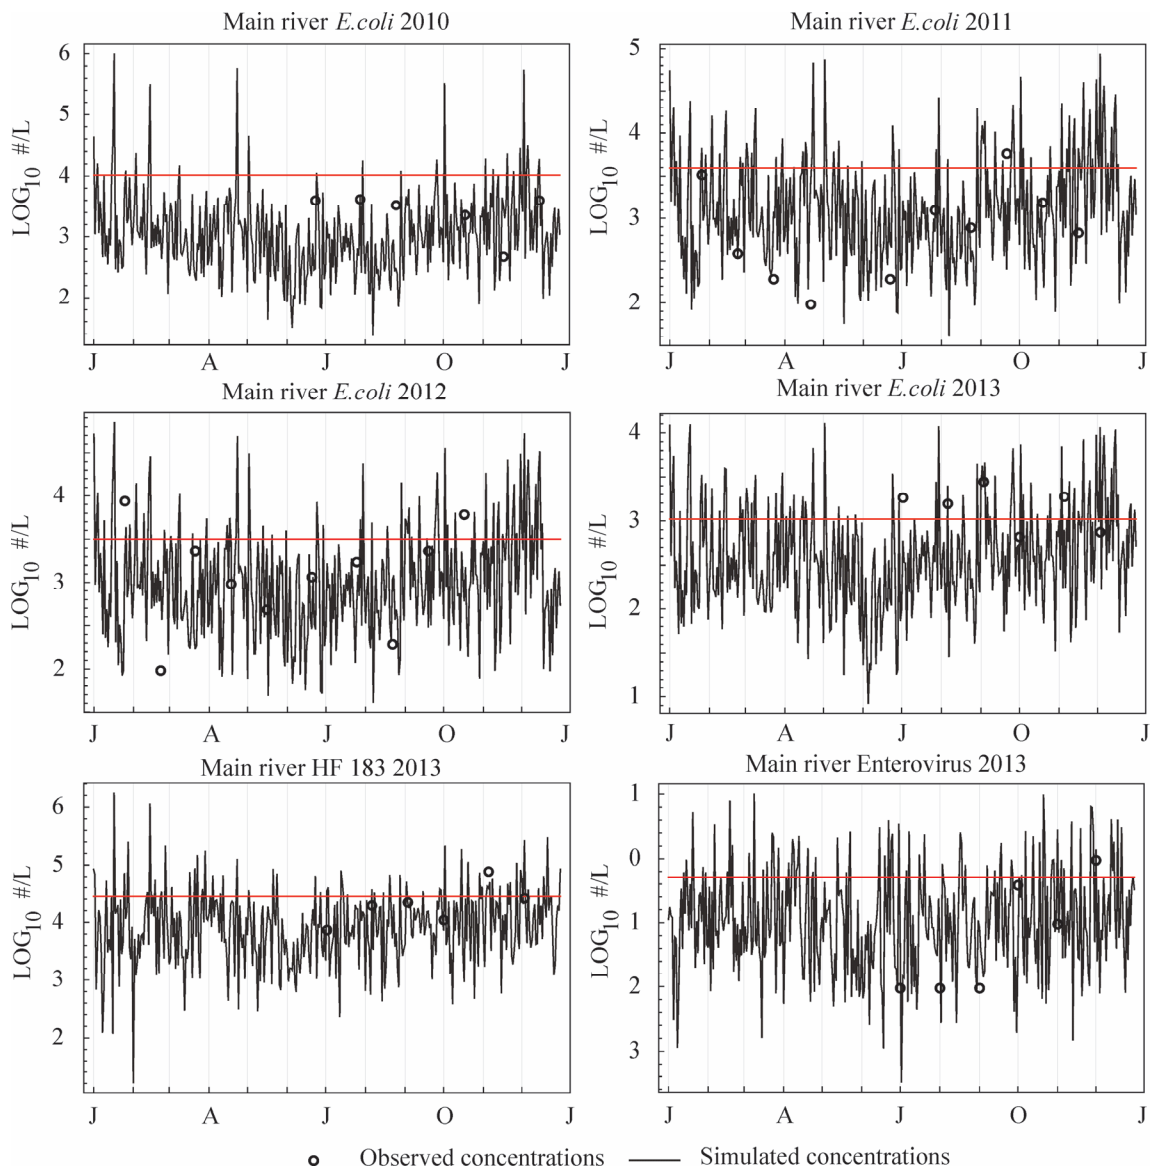

SI Figure 2: Simulated and observed concentrations of *E.coli* from 2010 to 2013 and of HF183\_II and enterovirus in 2013 at PI
